MARK H. ZORNOW, M.D.  
Associate Clinical Professor

University of California, San Diego  
9500 Gilman Drive  
La Jolla, California 92093-0629

Department of Anesthesiology and  
Neuroanesthesia Research,  
0629

# REFERENCE

1. Zacher AN, Zornow MH: Drug contamination from opening glass ampules. *ANESTHESIOLOGY* 75:893-895, 1991

(Accepted for publication December 13, 1991.)

Anesthesiology  
76:487, 1992

## Effects of Resuscitation Using Hypertonic Saline

*To the Editor:*—The report by Prough *et al.* on the use of hypertonic saline (HS) for resuscitation from hemorrhagic shock in the presence of increased intracranial pressure<sup>1</sup> seems a worthwhile contribution to a growing literature regarding the use of HS, and points once more to the potential clinical usefulness of this particular therapy. However, in reviewing their data, I noted that resuscitation with HS did not significantly increase cardiac output and in fact appeared inferior to resuscitation with normal saline in restoring cardiac output to baseline levels. This finding is not in keeping with multiple previous studies,<sup>2-4</sup> which have consistently shown HS to be quite effective in restoring cardiac output to normal or supernormal levels after hemorrhage and in many cases to be more effective than normal saline in this regard. Given that cardiac output indirectly affects cerebral perfusion pressure and cerebral blood flow, how might this anomalous finding affect the validity of Prough *et al.*'s conclusions?

In addition, I was surprised by the authors' assertion that HS can increase myocardial contractility. The studies that are widely quoted to show such an effect actually looked at the effects of serum hyperosmolality induced by sucrose or urea on the heart<sup>5</sup> and the effects of hyperosmotic sucrose on myocardial contractility.<sup>6</sup> Later reports have shown that HS is, as opposed to other hyperosmotic agents, a direct myocardial depressant.<sup>7,8</sup> Other authors have proposed a pulmonary/vagally mediated reflex resulting in systemic circulatory changes and increased cardiac contractility in response to HS<sup>9,10</sup>; recent studies have cast doubt on that assertion.<sup>11,12</sup> From the available data, I think it is safe to conclude that the improvement in cardiac output seen after resuscitation with HS is secondary to changes in preload alone and is not related to improved cardiac contractility.

STEVEN DEEM, M.D.  
Fellow, Critical Care Medicine  
Department of Anesthesiology  
Stanford University Medical Center  
Stanford, California 94305

# REFERENCES

1. Prough DS, Whitley JM, Taylor CL, Deal DD, DeWitt DS: Regional cerebral blood flow following resuscitation from hem-

- orrhagic shock with hypertonic saline: Influence of a subdural mass. *ANESTHESIOLOGY* 75:319-327, 1991
2. Velasco IT, Pontieri V, Rocha E Silva M, Lopes OU: Hyperosmotic NaCl and severe hemorrhagic shock. *Am J Physiol* 239:H664-H673, 1980
3. Nerlich M, Gunther R, Durling RH: Resuscitation from hemorrhagic shock with hypertonic saline or lactated Ringer's (effect on the pulmonary and systemic microcirculation). *Circ Shock* 10:179-188, 1983
4. Traverso WL, Bellamy RF, Hollenbach SJ, Witcher LD: Hypertonic sodium chloride solutions: Effect on hemodynamics and survival after hemorrhagic in swine. *J Trauma* 27:32-39, 1987
5. Wildenthal K, Mierzwia DS, Mitchell JH: Acute effects of increased serum osmolality on left ventricular performance. *Am J Physiol* 216:898-904, 1969
6. Wildenthal K, Skelton CL, Coleman HN: Cardiac muscle mechanics in hyperosmotic solutions. *Am J Physiol* 217:302-306, 1969
7. Newel JD, Higgins CB, Kelley MJ, Green CE, Schmidt WS, Haigler P: The influence of hyperosmolality on left ventricular contractile state: Disparate effects of nonionic and ionic solutions. *Invest Radiol* 15:363-370, 1980
8. Brown JM, Grosso MA, Moore EE: Hypertonic saline and dextran: Impact on cardiac function in the isolated rat heart. *J Trauma* 30:646-651, 1990
9. Lopes OU, Pontieri V, Rocha E Silva M, Velasco IT: Hyperosmotic NaCl and severe hemorrhagic shock: Role of the innervated lung. *Am J Physiol* 241:H883-H890, 1981
10. Rocha E Silva M, Negraes GA, Soares AM, Pontieri V, Loppnow L: Hypertonic resuscitation from severe hemorrhagic shock: Patterns of regional circulation. *Circ Shock* 19:165-175, 1986
11. Hands RD, Hoscraft JW, Perron PR, Kramer GC: Comparison of peripheral and central infusions of 7.5% NaCl/6% dextran-70. *Surgery* 103:684-689, 1988
12. Schertel ER, Valentine AK, Rademakers AM, Muir WW: Influence of 7% NaCl on the mechanical properties of the systemic circulation in the hypovolemic dog. *Circ Shock* 31:203-214, 1990

(Accepted for publication December 19, 1991.)
